# Supplementary material for: Importance of tides and winds in influencing the nonstationary behaviour of coastal currents in offshore Singapore
Source: Copernicus journal article supplement (doi:10.5194/egusphere-2024-143), 2024-01-19
Supplement: Supplementary file [file egusphere-2024-143-AC1-supplement.pdf]

## Answer to Anonymous Referee #1

This manuscript analyzed one-year observed tidal currents around two islands in offshore Singapore, using the short-term harmonic analysis, continuous wavelet transform and, magnitude-squared wavelet coherence. The results reveal the importance of tidal motions and monsoons in diurnal and subtidal periods. This manuscript is reasonably organized and the results can support the main conclusions. Please consider the below comments for improving the manuscript.

We thank the referee for their kind words.

- The authors use the WRF model to downscale the winds to 10 km resolution, so wind data should be available for both Pulau Hantu and Kusu Island for comparison, may the authors update Figure 3 and have a look at if there is any difference in wind strength and directions, which are important for further exploring the correlation between wind and currents in next sections.
- We have plotted the wind rose for Kusu Island as well. We updated Figure 3 and overlay both wind roses onto the maps with the tidal ellipses.
- May the authors provide the co-tidal and co-range charts in the vicinity of Singapore? Maybe it can help analyze the variation of the tidal amplitude and corresponding reasons.
- Thank you for the suggestion. While we agree that co-tidal and co-range charts could help in analyzing the variation of the tidal amplitude and corresponding reasons, we prefer to focus on interpreting the results of wavelet analysis to explain the nonstationary behaviour of coastal currents.
